# Supplementary material for: Fluvastatin Sodium Ameliorates Obesity through Brown Fat Activation
Source: MDPI journal article supplement (doi:10.3390/ijms20071622), 2019-04-01
Supplement: s1 [file s1]

Supplementary figures

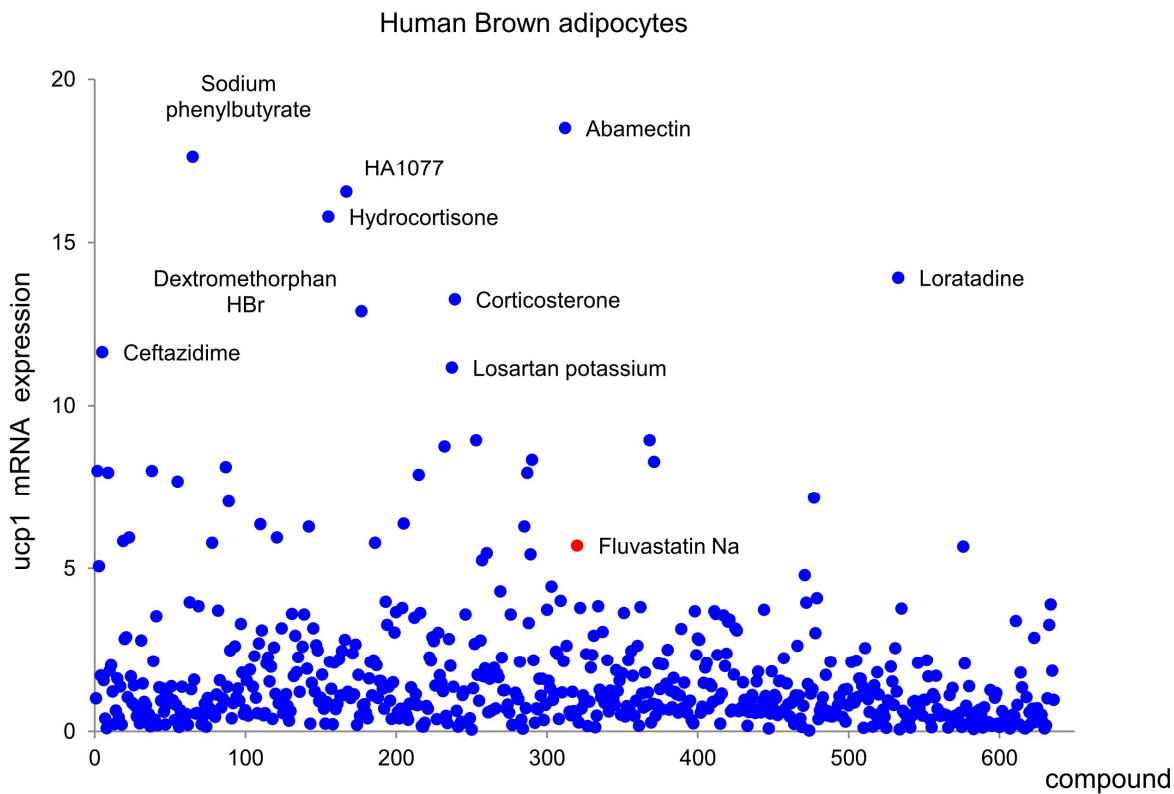

Figure s1. Compound screen by qRT-PCR.

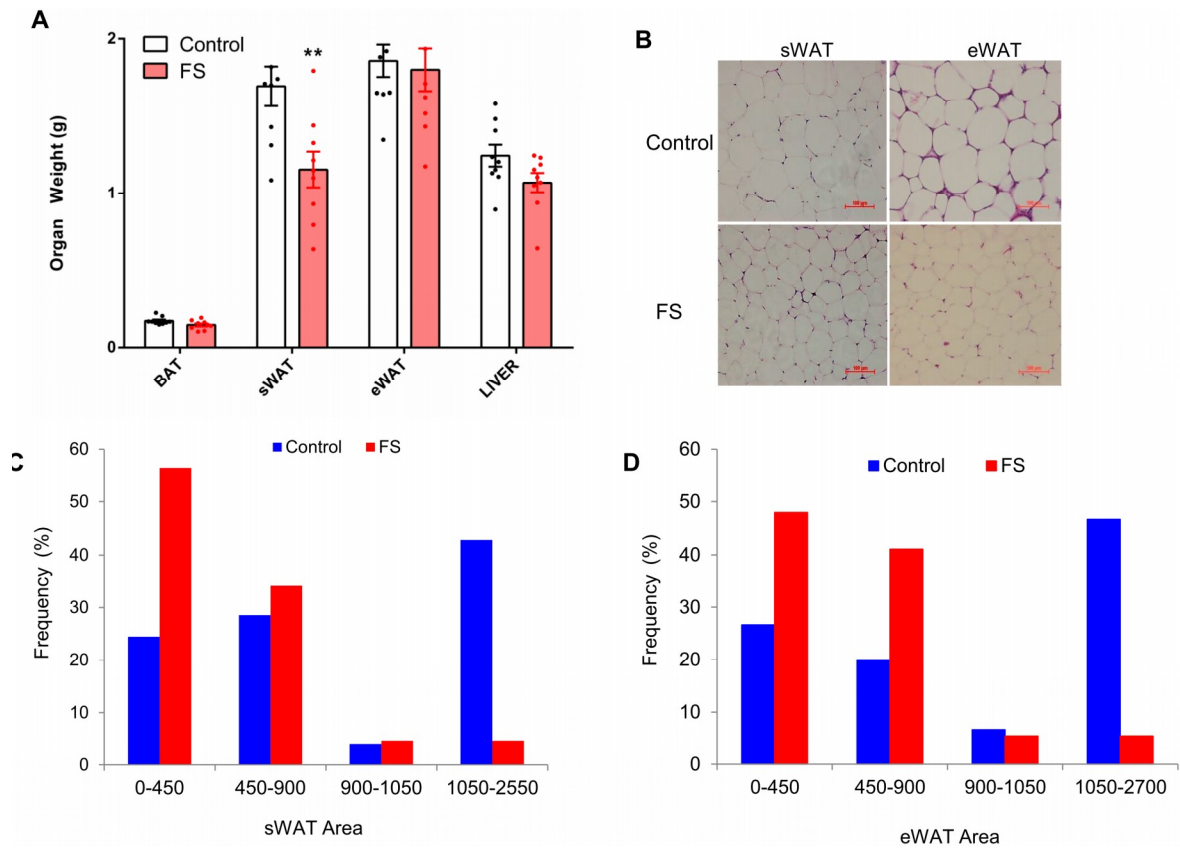

Figure S2. organ weight and immunohistochemical index.

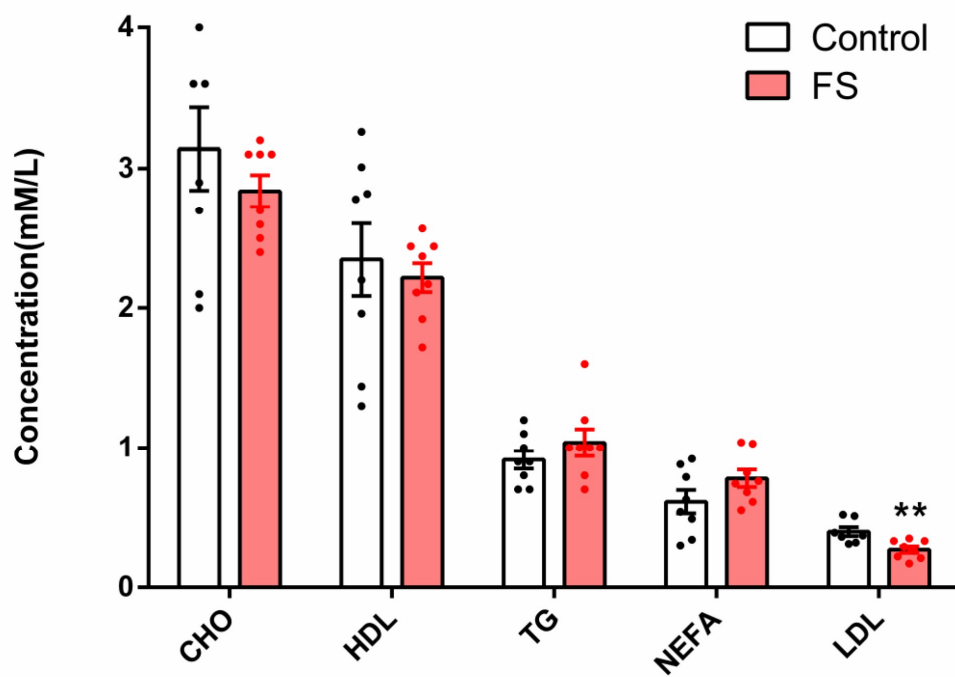

Figure s3. Plasma lipid profiles.
