# Supplementary material for: Fluvastatin Sodium Ameliorates Obesity through Brown Fat Activation
Source: Int J Mol Sci. 2019 Apr 1;20(7):1622. doi: 10.3390/ijms20071622 (PMC6479292; doi:10.3390/ijms20071622)
Supplement: Supplementary file 1 [file ijms-20-01622-s001.zip › ijms-462604-proof back suppl.xlsx]

## Sheet: Compounds library
	NAME
1	DMSO
2	Rocuronium bromide
3	Alfacalcidol
4	Lobeline
5	Ceftazidime
6	Mycophenolate mofetil
7	Dl-aminoglutethimide
8	Gefitinib
9	Tulobuterol
10	Vinorelbine
11	Sulbactam
12	Nicorandil
13	5-aminosalicylic acid
14	Imipenem
15	Ginkgolide a
16	Clarithromycin
17	Picotamide
18	4-aminosalicylic acid
19	Idarubicin
20	Salmeterol
21	Granisetron
22	Goserelin acetate
23	Propafenone
24	Trifluoperazine 2HCl
25	3'-azido-3'-deoxythymidine
26	Tolmetin Na
27	Dilazep
28	Sumatriptan Succinate
29	Methylprednisolone
30	Lomerizine HCl
31	Argatroban
32	Simvastatin
33	Tolazamide
34	Calcitriol
35	Calcipotriene
36	Fumagillin
37	Etoricoxib
38	Gemcitabine HCl
39	Tranilast
40	Anagrelide
41	Anastrozole
42	Deprenyl
43	Butoconazole nitrate
44	Bicalutamide
45	Cilostamide
46	Gabapentin
47	Melphalan
48	Minoxidil
49	Acetylsalicylic acid
50	Oxatomide
51	Imatinib
52	Dexamethasone
53	Exemestane
54	Chlormadinone acetate
55	Piribedil HCl
56	Atracurium besylate
57	Cabergoline
58	Donepezil HCl
59	Dinoprostone
60	Calcifediol
61	Guaiacol
62	Thiamphenicol glycinate
63	Metformin
64	Docetaxil
65	Sodium phenylbutyrate
66	Suramin sodium
67	Remoxipride
68	Troglitazone
69	Atazanavir
70	Danazol
71	Lomustine
72	Cetirizine 2HCl
73	Pentamidine
74	Lofexidine
75	Rivastigmine
76	Dofetilide
77	Puromycin 2HCl
78	Cefotaxime acid
79	Prednisolone
80	Bromocriptine mesylate
81	Thioridazine HCl
82	Bepridil
83	Octreotide
84	Dolasetron
85	Naltrexone HCl
86	Pranlukast
87	Dehydroepiandrosterone
88	Lomofungin
89	Erlotinib
90	Tranexamic acid
91	Atenolol
92	Bexarotene
93	Harmine
94	Letrozole
95	Citalopram
96	Oxaliplatin
97	Rapamycin
98	Loperamide
99	Amisulpride
100	Tizanidine HCl
101	Lincomycin
102	Ciprofloxacin
103	Troleandomycin
104	Nicardipine
105	Nimesulide
106	Diflunisal
107	Dihydroergotamine mesylate
108	Melatonin
109	Hydrocortisone 21-acetate
110	Ibudilast
111	Niguldipine HCl
112	Amlodipine
113	Oxymetazoline HCl
114	Dihydroergocristine mesylate
115	Mesoridazine besylate
116	Ipratropium Br
117	Vindesine
118	Nifedipine
119	Mycophenolic acid
120	Pramipexole
121	Trequinsin HCl
122	Fulvestrant
123	Trans-triprolidine HCl
124	Artemisinin
125	Iloprost
126	Mevastatin
127	Tioconazole
128	Sulpiride s (-)
129	Verapamil
130	Montelukast
131	Famciclovir
132	Bosentan
133	Bortezomib
134	Zaprinast
135	Gentamycin sulfate
136	Nitrendipine
137	Nimodipine
138	Auranofin
139	Siguazodan
140	Vatalanib
141	Glyburide
142	Naloxonazine 2HCl
143	Mefenamic acid
144	Haloperidol HCl
145	Valaciclovir
146	Zardaverine
147	Naproxen
148	Esmolol
149	Miltefosine
150	Oseltamivir
151	Lidocaine
152	Anethole-trithione (anetholtrithion)
153	Fenretinide
154	Etoposide
155	Hydrocortisone
156	Misoprostol
157	Tamoxifen citrate
158	Oxotremorine sesquifumarate
159	Ketanserin tartrate
160	Ketoconazole
161	Olopatadine
162	Hydroxytacrine maleate
163	Bezafibrate
164	Scopolamine n-butylbromide
165	Acitretin
166	Amoxicillin
167	HA1077
168	Zileuton
169	Desloratadine
170	Ergothioneine
171	Ethacrynic acid
172	Clindamycin palmitate
173	Tylosin tartrate
174	Nefazodone
175	Prazosin HCl
176	Clemastine fumarate
177	Dextromethorphan HBr
178	Fosinopril
179	Xamoterol hemifumarate
180	Clozapine
181	Flunarizine-2HCl
182	Pimozide
183	Cyclosporin a
184	Diltiazem
185	Enalapril
186	Spectinomycin
187	Itopride HCl
188	Tenatoprazole
189	PhentolamineHCl
190	Alprostadil
191	Clofibrate
192	Meglumine
193	Fluperlapine
194	L-thyroxine [(3-[4-(4-hydroxy-3,5-diiodophenoxy)-3,5-diiodophenyl]-l-alanine]
195	Gallamine triethiodide
196	Phenytoin
197	Latanoprost
198	Tolbutamide
199	Ifosfamide
200	Etazolate
201	Propranolol HCl s(-)
202	Phenoxybenzamine HCl
203	Valproic acid
204	Benzamil HCl
205	Dacarbazine
206	Tolfenamic acid
207	Aclarubicin
208	Amiloride
209	Cerivastatin
210	Manidipine
211	Chlorambucil
212	Fenbendazole
213	Ergotamine D-tartrate
214	Taxol
215	Disodium cromoglycate
216	Orphenadrine citrate
217	Azaperone
218	Clofarabine
219	Vincristine sulfate
220	Amifostine
221	Tolcapone
222	Roxithromycin
223	Levonorgestrel
224	Ondansetron
225	Felbamate
226	Propofol
227	Galanthamine HBr
228	Neomycin sulfate
229	Didanosine
230	Clonidine HCl
231	Meloxicam
232	Capecitabine
233	Temozolomide
234	Carvedilol
235	Nialamide
236	Carbadox
237	Losartan potassium
238	Fluspirilene
239	Corticosterone
240	Felodipine
241	Flumazenil
242	Ampiroxicam
243	Tacrine HCl
244	Procainamide
245	Fentiazac
246	Imiquimod
247	Denbufylline
248	Capsaicin
249	Cilnidipine
250	Myclobutanil
251	Maprotiline HCl
252	Furosemide
253	Cyproterone acetate
254	Pilocarpine HCl
255	Betaxolol HCl
256	Etretinate
257	Vinpocetine
258	Efavirenz
259	Physostigmine sulfate
260	Moroxydine HCl
261	Ifenprodil
262	Ivermectin
263	Topotecan
264	Amrinone
265	Ketoprofen+D153
266	Mitomycin c
267	Ganciclovir
268	Zafirlukast
269	Levetiracetam
270	Fluocinolone acetonide
271	Clenbuterol
272	Bopindolol malonate
273	Risperidone
274	Ouabain
275	Benserazide HCl
276	Guaifenesin
277	Methyldopa
278	Lomefloxacin HCl
279	Megestrol acetate
280	Alfuzosin
281	Clindamycin HCl
282	Canthaxanthin
283	Altretamine
284	Medroxyprogesterone 17-acetate
285	Tubocurarine Cl (+)
286	Norepinephrine-(+)-tartrate l (-)
287	Cyclocytidine HCl
288	Diethylstilbestrol
289	Bupivacaine HCl
290	Pantothenic acid
291	Leflunomide
292	Minocycline HCl
293	Naloxone HCl
294	Mephenytoin
295	Tropicamide
296	Pancuronium Br
297	Carboplatin
298	Clopamide
299	Guanabenz acetate
300	Hexestrol
301	Melengestrol acetate
302	Neostigmine Br
303	Ketotifen fumarate
304	Amantadine HCl
305	Isoproterenol HCl (rac)
306	Flubendazole
307	Triamcinolone
308	Tinidazole
309	Venlafaxine HCl
310	Molsidomine
311	Daunorubicin HCl
312	Abamectin
313	Ethisterone
314	Mitoxantrone 2HCl
315	Butaclamol (+)
316	Raclopride l-tartrate s(-)
317	Riluzole HCl
318	Acetylcholine Cl
319	Olanzapine
320	Fluvastatin Na
321	Dinoprost
322	Doxorubicin HCl
323	Tosufloxacin
324	Tramadol HCl
325	Lapatinib
326	Fenoprofen
327	Nadifloxacin
328	Bambuterol
329	Tiotidine
330	Fleroxacin
331	Glimepiride
332	Scopolamine HBr
333	nateglinide
334	Rolipram
335	Naphazoline HCl
336	Salbutamol sulfate
337	Estrone
338	Ibuprofen
339	Yohimbine HCl
340	Estradiol
341	Alprenolol HCl
342	Flufenamic acid
343	Pergolide mesylate
344	Formestane
345	Buphenine
346	Levamisole HCl
347	Dibenzepine HCl
348	Quinine
349	Linezolid
350	Vorinostat
351	Triptorelin
352	Nisoldipine
353	Tiotropium Br
354	Quetiapine fumarate
355	Decamethonium 2Br
356	Doxifluridine
357	Atovaquone
358	Famotidine
359	Tropisetron HCl
360	Lisinopril
361	Sparfloxacin
362	Doxazosin mesylate
363	Actarit
364	Glipizide
365	Flecainide
366	Emtricitabine
367	Nisoxetine HCl
368	Crotamiton
369	Oxiconazole nitrate
370	Indomethacin
371	Pirenzepine 2HCl
372	Diphenhydramine HCl
373	Metoclopramide HCl
374	Indapamide
375	Naftopidil 2HCl
376	Delavirdine mesylate
377	Estriol
378	Gatifloxacin
379	Retinoic acid
380	Astemizole
381	Terbinafine HCl
382	Levofloxacin HCl
383	Dobutamine HCl
384	Lorglumide
385	Pinacidil
386	Moxifloxacin HCl
387	Isoniazid
388	Fluoxetine HCl
389	Succinylcholine
390	Debrisoquin sulfate
391	Strychnine HCl
392	Cytarabine
393	Toremifene
394	Tibolone
395	Rosiglitazone maleate
396	Vardenafil
397	Cefoperazone acid
398	Cyclophosphamide monohydrate
399	Flutamide
400	Vecuronium Br
401	Vidarabine
402	Butenafine
403	10-hydroxycamptothecin
404	Itraconazole
405	Trimethoprim
406	Nalbuphine HCl
407	Ticlopidine HCl
408	Sodium phenylacetate
409	Levodopa
410	Domperidone
411	Camptothecin
412	Clobetasol propionate
413	Flurbiprofen
414	Imipramine HCl
415	Aceclofenac
416	Amiodarone
417	Fenoldopam mesylate
418	Fluconazole
419	Benzydamine
420	Diclofenac, Na
421	Gliclazide
422	Cefepime
423	Ribavirin
424	Trifluperidol 2HCl
425	Floxuridine
426	Fluphenazine 2HCl
427	Sertaconazole
428	Escitalopram
429	Amprenavir
430	Cimetidine
431	Amoxapine
432	Azathioprine
433	Telmisartan
434	Butyrylcholine Cl
435	Pindolol
436	zolmitriptan
437	Methysergide
438	Docebenone
439	Disulfiram
440	Ftorafur
441	Bleomycin sulfate
442	Promethazine HCl
443	Carbidopa
444	Gemfibrozil
445	Idebenone
446	Carbamyl-beta-methylcholine Cl
447	Pranoprofen
448	Candesartan
449	Memantine HCl
450	Amfebutamone
451	Zoledronic acid
452	Aminophylline
453	Xylazine HCl
454	Levallorphan tartrate
455	Telenzepine 2HCl
456	Sildenafil
457	Etidronate 2Na
458	Pioglitazone
459	Cinanserin
460	Eprosartan
461	Progesterone
462	Carbamylcholine Cl
463	Aripiprazole
464	Mebendazol
465	Bumetanide
466	Finasteride
467	Aprepitant
468	Vinblastine sulfate
469	Primaquine phosphate
470	Sulfadoxine
471	Doxycycline HCl
472	Doxofylline
473	Olmesartan
474	Acipimox
475	Sotalol HCl
476	Mepyramine maleate
477	Fenbufen
478	Idoxuridine
479	Captopril
480	Norfloxacin
481	Oxibendazole
482	Aniracetam
483	Amorolfine
484	Methyl salicylate
485	Spiperone
486	Epinephrine-(+)-tartrate l (-)
487	Terfenadine
488	Nicergoline
489	Naltrindole HCl
490	Mesulergine HCl
491	Lacidipine
492	Quinapril HCl
493	Dorzolamide
494	Cyproheptadine
495	Piroxicam
496	Ranolazine 2HCl
497	Tobramycin (free base)
498	Quinacrine 2HCl dihydrate
499	Entacapone
500	Cimaterol
501	Stanozolol
502	Enoxacin
503	Raloxifene HCl
504	Atropine sulfate
505	2',3' - dideoxycytidine
506	Pronethalol HCl
507	Mianserin hcl
508	Trichloromethiazide
509	Enalaprilat
510	Niflumic acid
511	Phenylpropanolamine
512	Procaterol hcl
513	Racecadotril
514	Sulfasalazine
515	Novobiocin Na
516	Oxfendazole
517	Apomorphine r (-)
518	Terazosin HCl
519	Ozagrel
520	Miglustat
521	Methimazole
522	Oxacillin sodium monohydrate
523	Lovastatin
524	Betamethasone
525	Procarbazine HCl
526	Rilmenidine hemifumarate
527	Sulfadiazine
528	Tetracycline
529	Clodronate disodium
530	Practolol
531	Esomeprazole potassium
532	Sulfadimethoxine
533	Loratadine
534	Prednisone
535	Dipyridamole
536	Spironolactone
537	Nystatin
538	Celecoxib
539	Pregnenolone
540	Nelfinavir Mesylate
541	Paroxetine HCl
542	Meropenem
543	Naltriben methanesulfonate hydrate
544	Rufloxacin
545	Sarafloxacin HCl
546	5-fluorouracil
547	Chlorpromazine HCl
548	Ramipril
549	Pyrantel pamoate
550	Tamsulosin HCl
551	Taurocholic acid, sodium salt hydrate
552	Fenofibrate
553	Praziquantel
554	Idazoxan
555	Metoprolol tartrate
556	Zonisamide
557	Guanfacine HCl
558	Tranylcypromine
559	Acycloguanosine
560	Pazufloxacin
561	Ambroxol
562	Furafylline
563	Ofloxacin
564	Roxatidine acetate HCl
565	Ketoprofen
566	Propranolol
567	Mecamylamine HCl
568	Ranitidine HCl
569	Canrenone
570	Rebamipide
571	Prothionamide
572	Secnidazole
573	Sibutramine HCl
574	Vitamin a (acetate)
575	Allopurinol
576	Rifampicin
577	Lamotrigine
578	Timolol maleate (s)
579	Pantoprazole
580	Enrofloxacin
581	Oxcarbazepine
582	Nabumetone
583	Ampicillin trihydrate
584	Pentoxifylline
585	Rimantadine HCl
586	Phenylbutazone
587	Apramycin
588	Clomiphene citrate
589	Miconazole
590	Diazoxide
591	Pencillin v potassium
592	Gestrinone
593	Pravastatin lactone
594	Pravadoline
595	Oltipraz
596	Rofecoxib
597	Omeprazole
598	Bifonazole
599	Piperacillin
600	Ibandronate
601	Penciclovir
602	Tenoxicam
603	Carbamazepine
604	Norethindrone
605	Albendazole
606	Sulindac
607	Pefloxacine mesylate
608	Anethole, trans-
609	Risedronic acid
610	Bisacodyl
611	Nifekalant HCl
612	Clothiapine
613	Thalidomide
614	Pamidronic acid
615	Clopidogrel sulfate
616	Metronidazole
617	Aztreonam
618	Nedaplatin
619	Ricobendazole
620	Climbazole
621	Clinafloxacin HCl
622	Bromhexine HCl
623	Chloramphenicol
624	Alendronate
625	Buspirone HCl
626	Chlorpheniramine maleate
627	Rifamycin sv
628	Azithromycin
629	Acemetacin
630	Streptomycin sulfate
631	Chloroquine phosphate
632	Plicamycin
633	Mifepristone
634	17- hydroxyprogesterone
635	Artesunate
636	Cilastatin
